# Supplementary material for: A Review of Uric Acid, Crystal Deposition Disease, and Gout
Source: PubMed Central journal article supplement — Adv Ther. 2014 Dec 23;32(1):31–41. doi: 10.1007/s12325-014-0175-z (PMC4311063; doi:10.1007/s12325-014-0175-z), 2014-12-23
Supplement: 12325_2014_175_MOESM1_ESM.pdf [file 12325_2014_175_MOESM1_ESM.pdf]

- Long-term hyperuricemia is the final cause of urate-crystal deposition in tissues and the development of gout, its prevalence increasing in the last decades.
- Hyperuricemia and gout have been associated to increased risk of both mortality and cardiovascular events.
- New imaging techniques, such as ultrasonography and dual-energy computed tomography have raised increasing interest diagnosis, evaluation of deposition and damage, and response to urate-lowering therapy.
- The final objective of the treatment of gout is to completely dissolve crystals, what is associated to improvement of symptoms and prevention of further inflammation and damage.
- Defining targets for serum urate levels while on urate-lowering therapy will depend on the extent of deposition, severity of disease, but also to whether debulking of formed crystals or prevention of new crystal formation is intended.

This summary slide represents the opinions of the authors. For a full list of acknowledgments and conflicts of interest for all authors of this article, please see the full text online. Copyright © The Authors 2014. Creative Commons Attribution Noncommercial License (CC BY-NC).
